# Supplementary material for: Clinical relevance of low serum vitamin B12 concentrations in older people: the Banbury B12 study
Source: Oxford University Press journal article supplement (doi:10.1093/ageing/afl033), 2006-05-18

## **APPENDIX Table 1: Assessment of neuropathy**

Six questions were used to assess symptoms of neuropathy:

- 1) Do you feel unsteady when walking in the dark (e.g. when walking to the bathroom at night)? Yes or No
- 2) Do you have altered sensation in your feet on walking (e.g. feeling like walking on cotton wool)? Yes or No
- 3) Have you had any falls in the last month? Yes or No
- 4) Do you have pins and needles in your feet? No or Yes – above ankle or feet only?
- 5) Do you have burning in your feet? No or Yes - above ankle or feet only?
- 6) Do the bed clothes upset your feet when they are in contact with them at night? No or Yes- above ankle or feet only

A number of clinical measurements bilaterally were used to assess clinical signs of neuropathy:

- 1) Knee tendon jerk
- 2) Ankle tendon jerk
- 3) Joint position sense present on distal interphalangeal joint of the great toe

In addition, a plantar response was elicited and the presence of symptoms and signs were combined to produce a neuropathy score. Symptoms were scored (maximum score 6) for questions 1-3, as 1 point if present and for questions 3-6 as 1 point if present above ankle and 0.5 point if confined to the feet only. Clinical signs were scored (maximum score 8) as 1 point for each absent reflex. Individuals were classified as having peripheral neuropathy if they had a symptom score greater than 2 together with a clinical sign score greater than 2. In addition missing ankle jerks were examined separately as a more sensitive test for early evidence of neuropathy.

**Appendix Table 2: The effect of treatment with vitamin B12 injections in participants with initial low serum vitamin B12 concentrations (n=100)**

| <b>Biochemical variables</b> | <b>Pre-treatment<br/>50<sup>th</sup> (25-75<sup>th</sup>)<br/>percentiles</b> | <b>Post-treatment<br/>50<sup>th</sup> (25-75<sup>th</sup>)<br/>percentiles</b> | <b>Absolute change<br/>50<sup>th</sup> (25-75<sup>th</sup>)<br/>percentiles</b> |
|------------------------------|-------------------------------------------------------------------------------|--------------------------------------------------------------------------------|---------------------------------------------------------------------------------|
| B12 (Bayer), pM              | 141 (110-159)                                                                 | 590 (407-1007)                                                                 | 458 (292 to 881)                                                                |
| B12 (Beckman)pM              | 113 (90-124)                                                                  | 550 (412-1003)                                                                 | 443 (307 to 896)                                                                |
| HoloTC, pmol/L               | 30 (21-43)                                                                    | 211 (120-333)                                                                  | 161 (81 to 305)                                                                 |
| tHcy, µmol/L                 | 18.5 (13.4-23.3)                                                              | 11.0 (9.6-13.8)                                                                | -7.1 (-3.4 to -10.4)                                                            |
| MMA, µmol/L                  | 0.43 (0.29-0.79)                                                              | 0.19 (0.16-0.23)                                                               | -0.24 (0.10 to -0.56)                                                           |
| Folate, nmol/L               | 19 (13-30)                                                                    | 23 (13 - 34)                                                                   | 2 (-3 to 9)                                                                     |

**Appendix Figure (1) Flow sheet of study participants**

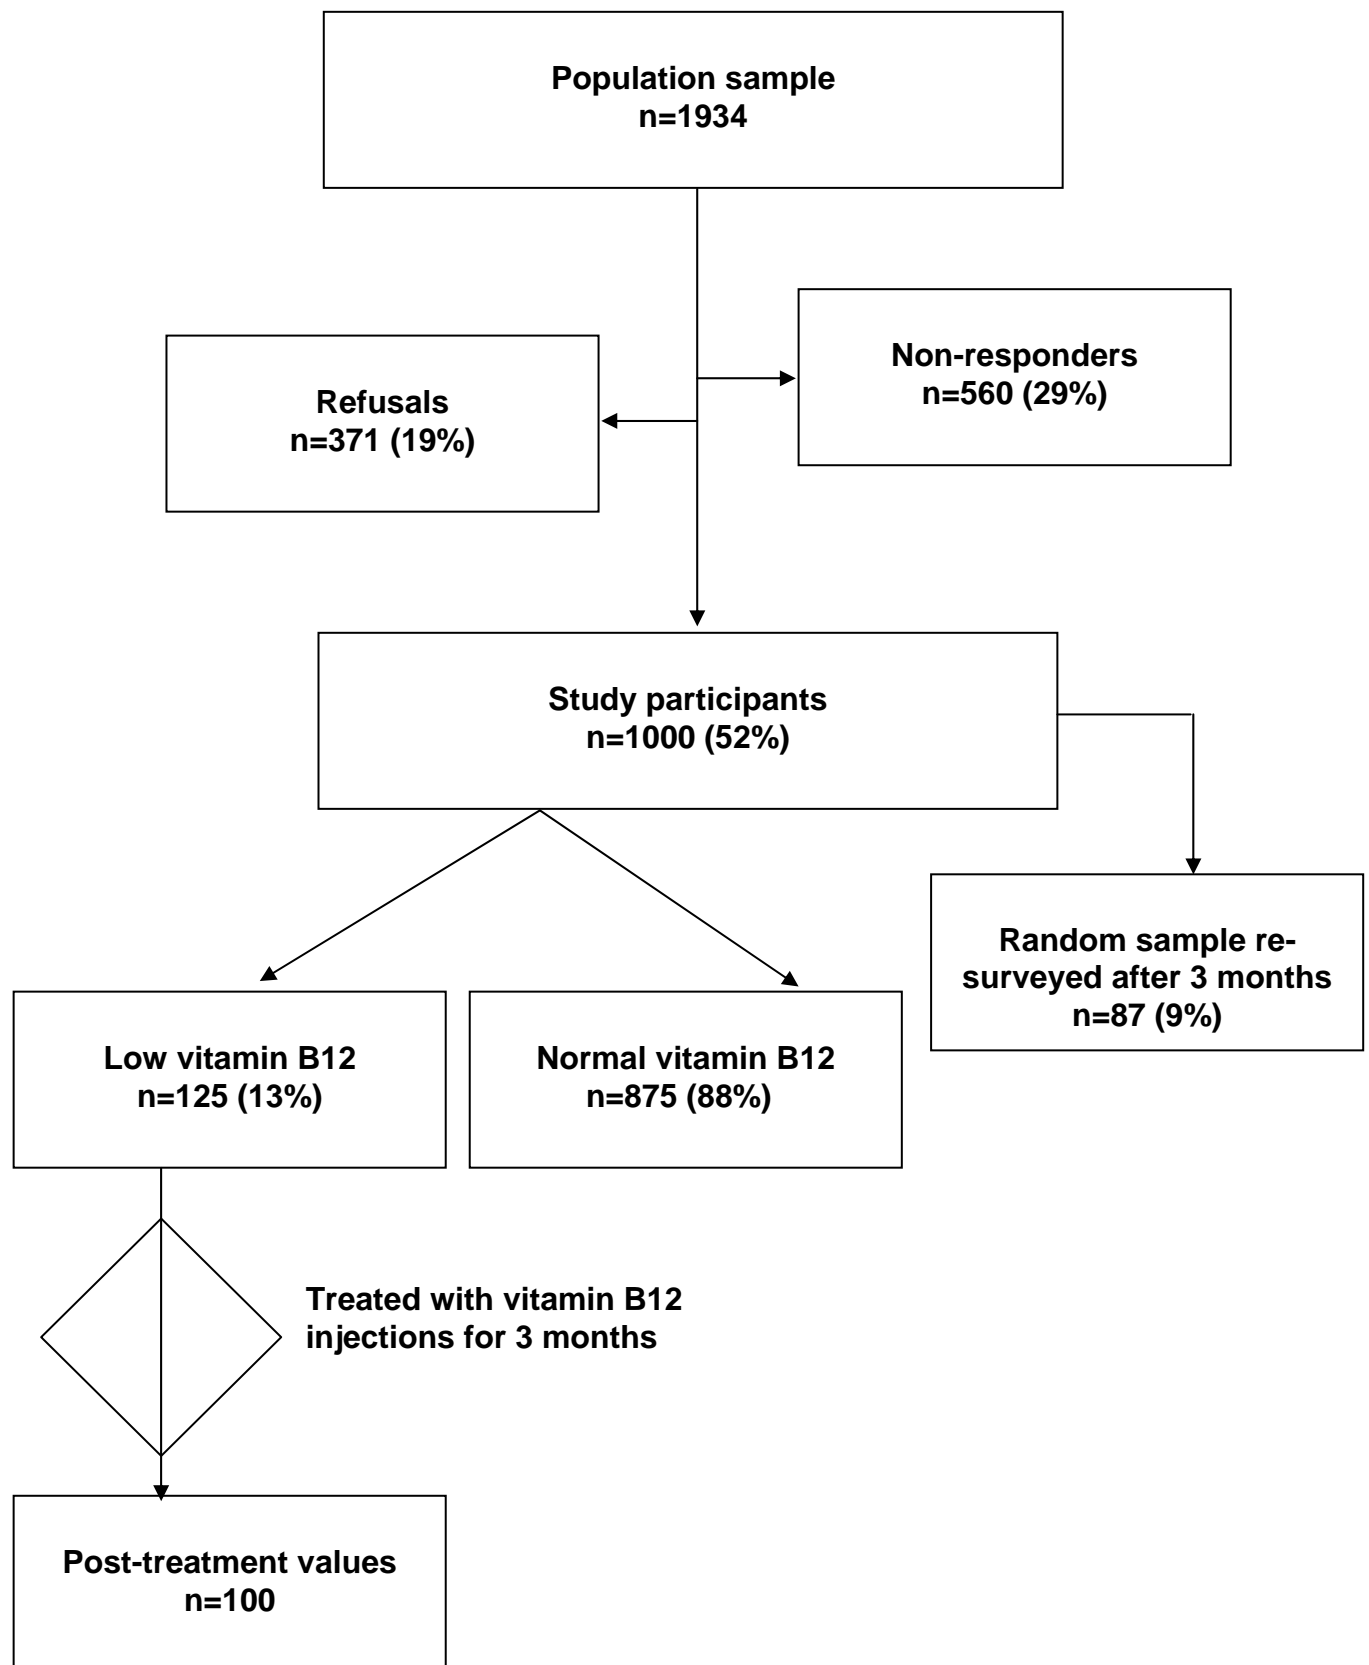

**Figure (2): Effect of vitamin B12 on plasma MMA concentrations**

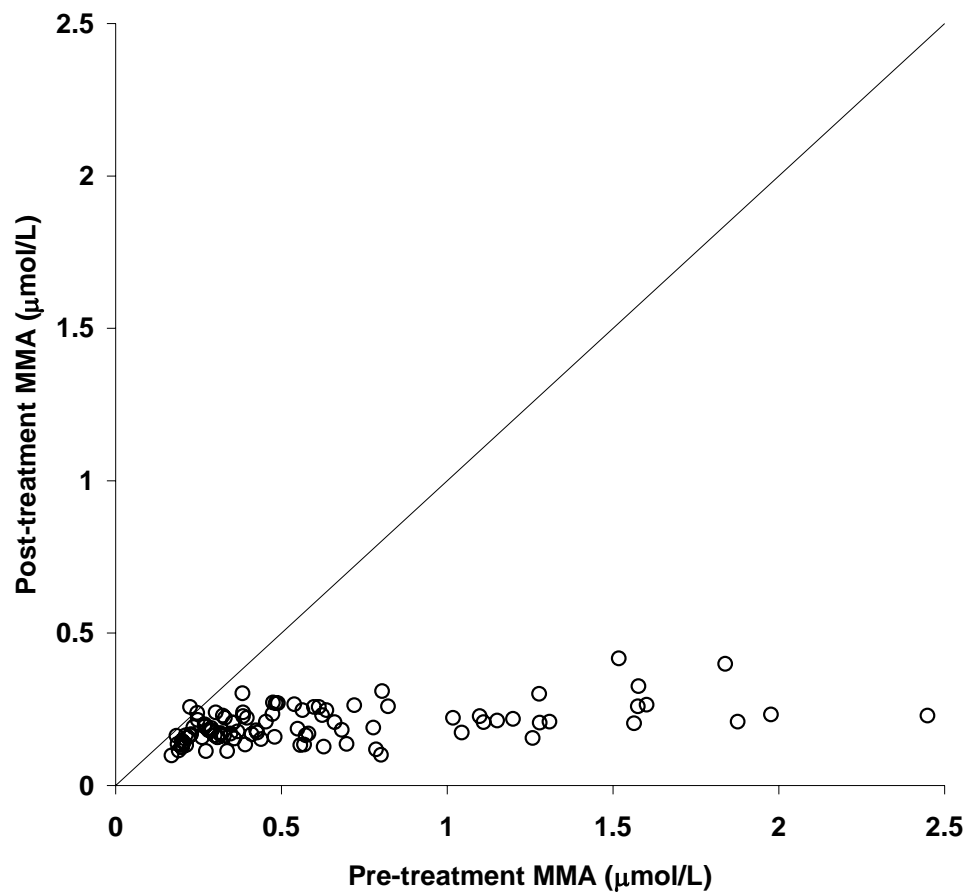

Supplement: afl033_Supplementary_Data.zip [file afl033_Supplementary_Data.zip › afl033_suppl_data.pdf]
