# Supplementary material for: Clinical relevance of low serum vitamin B12 concentrations in older people: the Banbury B12 study
Source: Oxford University Press journal article supplement (doi:10.1093/ageing/afl033), 2006-05-18
Supplement: afl033_Supplementary_Data.zip [file afl033_Supplementary_Data.zip]

Archive with 1 entries (1 files):
- afl033_suppl_data.pdf
